# Supplementary material for: Isolation of Small Extracellular Vesicles from Human Sera
Source: MDPI journal article supplement (doi:10.3390/ijms22094653), 2021-04-28
Supplement: s1 [file s1]

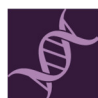

Supplementary Materials

# Isolation of Small Extracellular Vesicles from Human Sera

Małgorzata S. Małys <sup>1</sup>, Christof Aigner <sup>1,2</sup>, Stefan M. Schulz <sup>1</sup>, Helga Schachner <sup>1</sup>, Andrew J. Rees <sup>1</sup>, Renate Kain <sup>1,\*</sup>

<sup>1</sup> Department of Pathology, Medical University Vienna, 1090 Vienna, Austria; małgorzata.malys@meduniwien.ac.at (M.S.M.); christof.aigner@meduniwien.ac.at (C.A.); stefan.schulz@meduniwien.ac.at (S.M.S.); helga.schachner@meduniwien.ac.at (H.S.); andrew.rees@meduniwien.ac.at (A.J.R.)

<sup>2</sup> Division of Nephrology and Dialysis, Department of Medicine III, Medical University Vienna, 1090 Vienna, Austria

\* Correspondence: rena.te.kain@meduniwien.ac.at

**Supplementary Table S1.** Small extracellular vesicles (sEV) properties obtained by nanoparticle tracking analysis presented for individual sEV preparations that were purified from the same serum sample by differential ultracentrifugation (DUC) and Exo-spin™. Additional letters (ie. b) next in donor column indicate additional timepoints of sampling.

| Donor | Method    | Mean Size (nm) | Median Size (nm) | Total Isolated Part. No (×10 <sup>8</sup> ) | Part. No (×10 <sup>8</sup> )/mL Serum | Absolute No. of Part. <150 nm (×10 <sup>8</sup> )/mL Serum |
|-------|-----------|----------------|------------------|---------------------------------------------|---------------------------------------|------------------------------------------------------------|
| D1    | DUC       | 152.00         | 140.00           | 8.07                                        | 4.03                                  | 2.29                                                       |
| D2    | DUC       | 138.67         | 137.67           | 1.21                                        | 0.61                                  | 0.35                                                       |
| D3    | DUC       | 141.67         | 132.33           | 1.17                                        | 0.58                                  | 0.37                                                       |
| D4    | DUC       | 149.33         | 138.33           | 1.13                                        | 0.57                                  | 0.32                                                       |
| D5    | DUC       | 127.00         | 112.40           | 0.51                                        | 0.26                                  | 0.18                                                       |
| D6    | DUC       | 143.00         | 137.33           | 0.56                                        | 0.28                                  | 0.16                                                       |
| D6b   | DUC       | 136.67         | 126.67           | 2.40                                        | 1.20                                  | 0.82                                                       |
| D1b   | DUC       | 174.00         | 160.00           | 1.11                                        | 0.55                                  | 0.24                                                       |
| D2b   | DUC       | 170.67         | 157.67           | 1.68                                        | 0.84                                  | 0.37                                                       |
| D1    | Exo-spin™ | 136.00         | 129.00           | 9.33                                        | 93.33                                 | 61.07                                                      |
| D2    | Exo-spin™ | 150.67         | 145.33           | 0.63                                        | 6.27                                  | 3.53                                                       |
| D3    | Exo-spin™ | 138.67         | 133.00           | 9.47                                        | 94.67                                 | 61.91                                                      |
| D4    | Exo-spin™ | 133.67         | 126.00           | 24.00                                       | 240.00                                | 162.56                                                     |
| D5    | Exo-spin™ | 132.00         | 123.00           | 0.51                                        | 5.07                                  | 3.52                                                       |
| D6    | Exo-spin™ | 136.00         | 126.67           | 33.47                                       | 334.67                                | 223.67                                                     |
| D6b   | Exo-spin™ | 102.33         | 95.30            | 254.67                                      | 2546.67                               | 2284.36                                                    |
| D1b   | Exo-spin™ | 132.33         | 113.67           | 90.67                                       | 906.67                                | 658.54                                                     |
| D2b   | Exo-spin™ | 131.00         | 116.67           | 25.07                                       | 250.67                                | 180.48                                                     |

**Supplementary Table S2.** Median APC fluorescence intensities of small extracellular vesicles preparations that were purified by differential ultracentrifugation (DUC) or Exo-spin™ and analysed by bead-based flow cytometry (MACSPlex). The data is shown as a heatmap with corresponding values included in the frame. Graded colour scale: low values (green) to high values (red).

| Method | DUC  |      |      |     |      |      | Exo-spin™ |     |     |      |      |      |
|--------|------|------|------|-----|------|------|-----------|-----|-----|------|------|------|
| Donor  | D1   | D2   | D3   | D4  | D5   | D6   | D1        | D2  | D3  | D4   | D5   | D6   |
| CD3    | 6020 | −119 | 2346 | 178 | 3082 | 2237 | −70       | −73 | −47 | −124 | 1384 | −873 |
| CD4    | 111  | 78   | 272  | 170 | 242  | −39  | −43       | 22  | −67 | 321  | 1701 | −12  |

|            |       |       |       |       |       |       |       |      |      |      |       |      |
|------------|-------|-------|-------|-------|-------|-------|-------|------|------|------|-------|------|
| CD19       | -52   | -13   | 145   | -95   | 51    | -129  | 9     | 54   | -7   | 174  | 1755  | 125  |
| CD8        | 533   | 555   | 604   | 1134  | 1836  | -70   | 915   | 898  | -84  | 516  | 3814  | 251  |
| HLA-DRDPDQ | 12308 | 3145  | 8943  | 13230 | 29040 | 5748  | 1667  | 676  | 753  | 1079 | 7604  | 1455 |
| CD56       | 8444  | 95    | 1633  | -405  | 5060  | 2985  | -107  | -125 | -46  | -101 | 1979  | -681 |
| CD105      | 2294  | 365   | 6116  | 1829  | 5061  | 1019  | 182   | 94   | -779 | 721  | 2691  | 161  |
| CD2        | 248   | 8     | 762   | -152  | 84    | -441  | -22   | -24  | 11   | 523  | 1399  | -296 |
| CD1c       | -23   | -209  | 48    | 197   | -531  | -667  | -65   | 20   | 48   | 321  | 1066  | -427 |
| CD25       | 2312  | 456   | -74   | -338  | 2901  | 1466  | -2    | 53   | -257 | 159  | 1593  | -223 |
| CD49e      | 934   | -133  | 1299  | 934   | 120   | -358  | -172  | -94  | 77   | 343  | 1200  | -424 |
| ROR1       | 236   | -92   | 700   | 420   | 481   | -2    | 26    | 68   | 338  | 539  | 2149  | 215  |
| CD209      | 30    | -89   | 371   | 110   | 0     | -208  | -48   | -10  | 197  | 544  | 1930  | 91   |
| CD9        | 54533 | 9551  | 21281 | 15284 | 45462 | 27984 | 9180  | 1264 | 1433 | 2077 | 13367 | 3846 |
| SSEA-4     | 249   | -181  | 611   | -593  | 84    | -301  | -271  | -319 | -536 | 149  | 1400  | -397 |
| HLA-ABC    | 42352 | 8409  | 5332  | 4058  | 39848 | 11074 | 1546  | 291  | 447  | 635  | 5506  | 681  |
| CD63       | 43448 | 6166  | 27300 | 25949 | 41793 | 27304 | 25267 | 3040 | 5759 | 5696 | 21731 | 6354 |
| CD40       | 6766  | 487   | 1570  | 711   | 5313  | 1708  | 269   | -94  | 214  | 251  | 1838  | 227  |
| CD62P      | 72653 | 6877  | 53538 | 17957 | 56853 | 43075 | 10402 | 844  | 6472 | 5054 | 10102 | 2157 |
| CD11c      | -114  | -145  | 805   | 429   | -452  | -522  | -94   | -4   | -11  | 477  | 1252  | -225 |
| CD81       | 3821  | 2048  | 7429  | 5620  | 13200 | 3313  | 4186  | 2133 | 912  | 1092 | 11397 | 2863 |
| MCSP       | -48   | -57   | 378   | 115   | 0     | -59   | -141  | -69  | -8   | 80   | 1654  | 29   |
| CD146      | 627   | 218   | 1088  | 2452  | 2773  | 244   | 164   | 60   | 222  | 441  | 1936  | 186  |
| CD41b      | 80221 | 10709 | 34673 | 20092 | 60168 | 27171 | 18368 | 1217 | 5695 | 4717 | 17789 | 3779 |
| CD42a      | 89024 | 7806  | 29923 | 19305 | 56520 | 26983 | 7922  | 819  | 1534 | 4072 | 8643  | 2627 |
| CD24       | 29251 | 2760  | 8031  | 836   | 15203 | 5068  | 315   | 331  | 203  | 846  | 3251  | 795  |
| CD86       | 760   | 144   | 1323  | 903   | 1354  | 245   | 91    | 128  | -2   | 363  | 2105  | 201  |
| CD44       | 1009  | 1032  | 1690  | 2280  | 2141  | 979   | 85    | 137  | 148  | 221  | 2551  | 10   |
| CD326      | 248   | 9     | 1202  | 93    | 663   | -3    | -78   | -9   | 151  | 569  | 1574  | -48  |
| CD133/1    | 201   | -2    | 140   | 267   | 243   | 85    | 23    | 52   | -146 | 687  | 1539  | 113  |
| CD29       | 55982 | 7216  | 23514 | 17969 | 39334 | 15999 | 6205  | 724  | 914  | 3036 | 6224  | 1428 |
| CD69       | 3409  | 440   | 2020  | 1186  | 2457  | 814   | 266   | 53   | 378  | 430  | 1747  | 18   |
| CD142      | 1691  | -26   | 2188  | 774   | 935   | 506   | -76   | -62  | 373  | 301  | 1770  | 194  |
| CD45       | 4882  | 561   | 4110  | 256   | 2742  | -13   | 45    | 284  | -63  | 346  | 1302  | -767 |
| CD31       | 12166 | 614   | 1924  | 763   | 8290  | 2405  | 559   | 79   | -52  | 488  | 2331  | 229  |
| REA ctrl   | -96   | -23   | 331   | 829   | -74   | -202  | -83   | -21  | 635  | 731  | 1761  | -2   |
| CD20       | 110   | -20   | 355   | 542   | -37   | -158  | -59   | 10   | 168  | 251  | 1496  | 74   |
| CD14       | 682   | 230   | 2636  | -308  | 597   | 236   | -26   | 165  | -365 | -918 | 1572  | 20   |
| mlgG1 ctrl | 81    | -14   | 688   | 482   | 27    | -4    | 22    | 67   | -253 | 34   | 1641  | 173  |

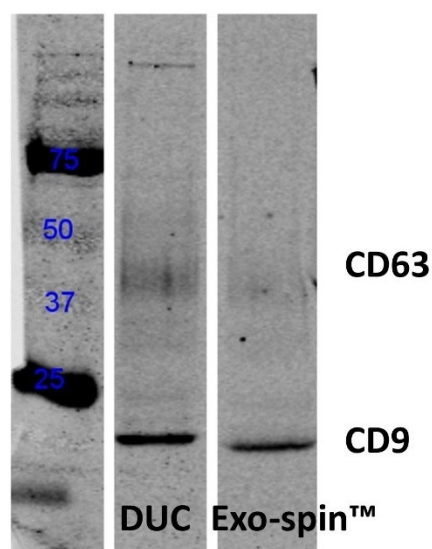

(a)

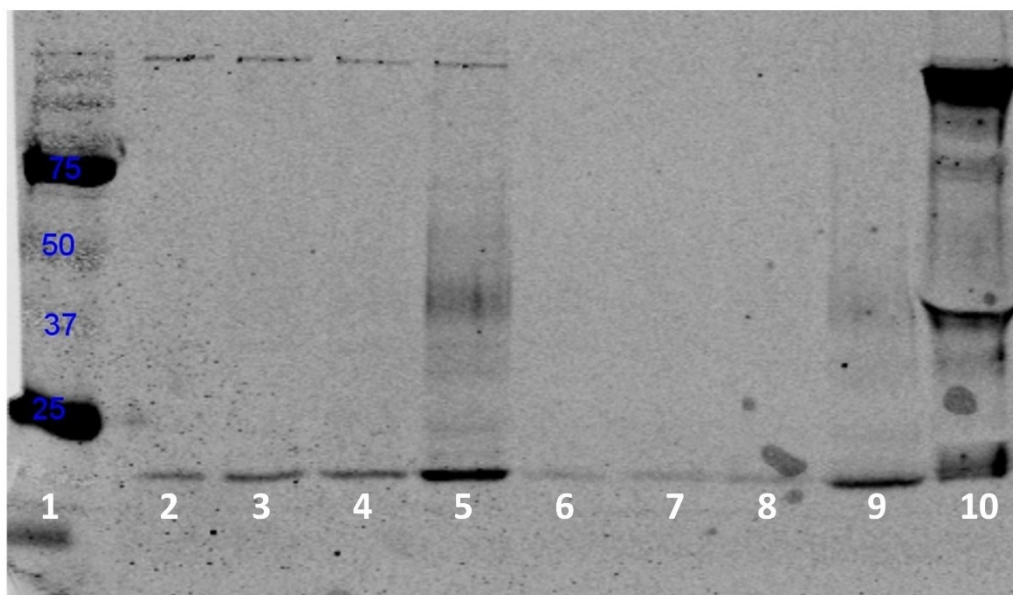

(b)

**Supplementary Figure S1.** Western blot of small extracellular vesicle (sEV) preparation purified by differential ultracentrifugation (DUC) and Exo-spin™ stained for CD9 and CD63 antibody. Image (a) presents the cut-out examples of sEV preparations purified from paired serum by DUC and Exo-spin05™. Image (b) shows the whole blot from which the lanes were cut out. Each lane stands for following: 1: marker; 2: sEV purified from plasma by DUC; 3: sEV purified from PPP by DUC; 4: sEV purified from defibrinated plasma by DUC; 5: sEV purified from serum by DUC; 6: sEV purified from plasma by Exo-spin05™; 7: sEV purified from PPP by Exo-spin05™; 8: sEV purified from defibrinated plasma by Exo-spin05™; 9: sEV purified from serum by Exo-spin05™; 10: sEV purified from serum by Exo-spin03™.

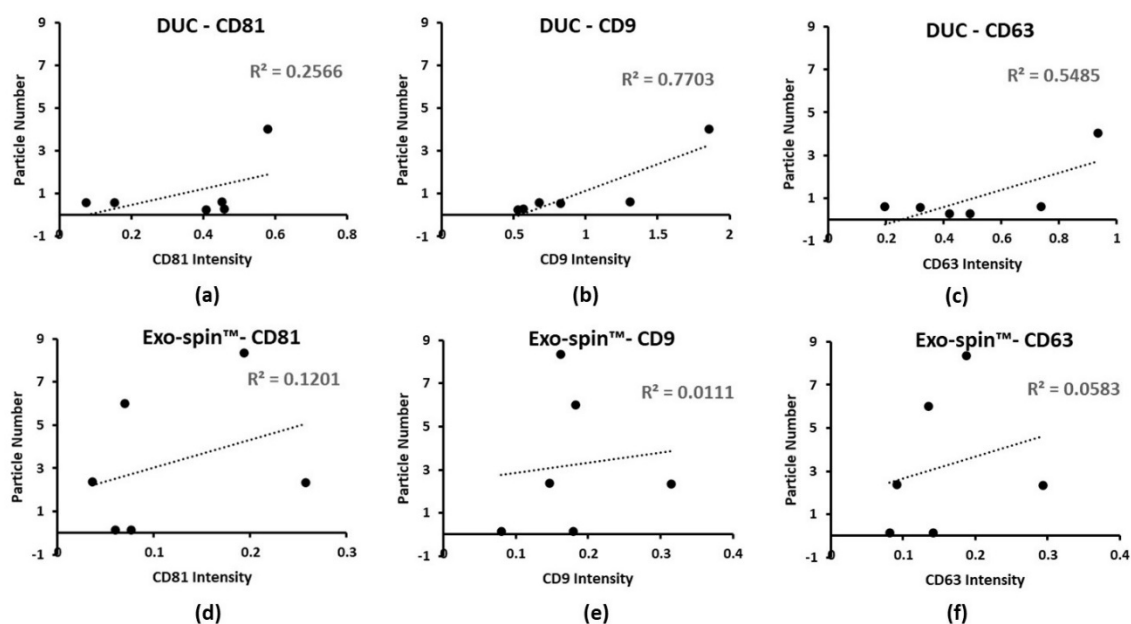

**Supplementary Figure S2.** Correlation between isolated particle numbers measured by nanoparticle tracking analysis and the mean intensity of marker expression measured by ELISA for small extracellular vesicles (sEV) purified by differential ultracentrifugation (DUC) and Exo-spin<sup>TM</sup> (Exo-spin05). Upper row (a-c): Differential ultracentrifugation; lower row (d-f): Exo-spin<sup>TM</sup>. First column presents CD81, Second: CD9 and the third: CD63.

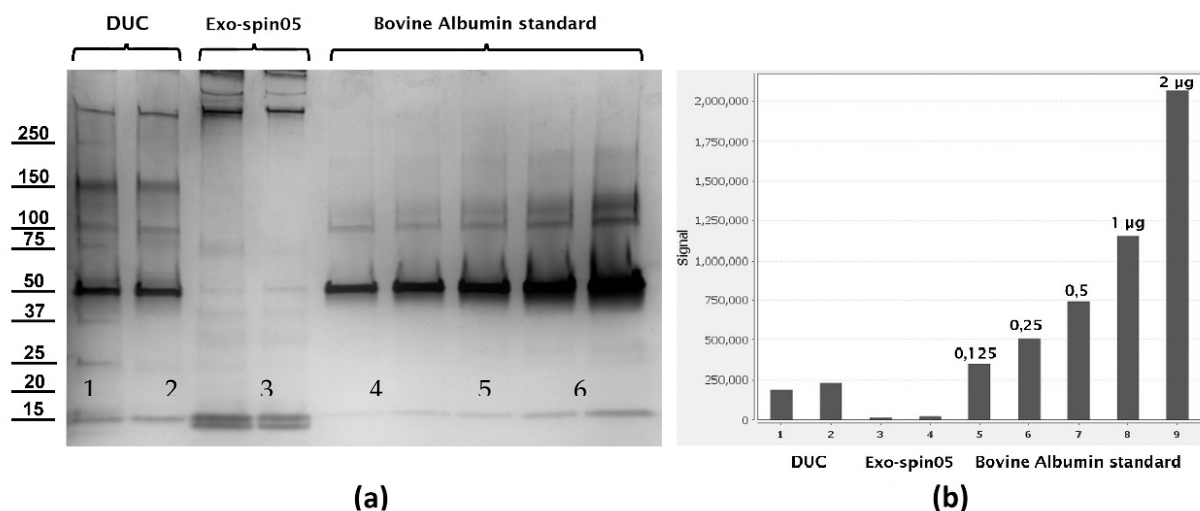

**Supplementary Figure S3.** Silver protein staining (a) of lysed small extracellular vesicles (lanes 1–4) purified from: serum (lane 1 and 3) and plasma (lane 2 and 4), respectively, isolated by differential ultracentrifugation (DUC) (lane 1 and 2) and Exo-spin<sup>TM</sup> (lane 3 and 4). Lanes 5–9 correspond to increasing amounts of Bovine Albumin Standard (0,125  $\mu$ g (lane 5); 0,25  $\mu$ g (lane 6); 0,5  $\mu$ g (lane 7); 1  $\mu$ g (lane 8); 2  $\mu$ g (lane 9)). Figure (b) displays the measured signal intensities of each band in the area of molecular weight corresponding to the albumin (66 kDa).

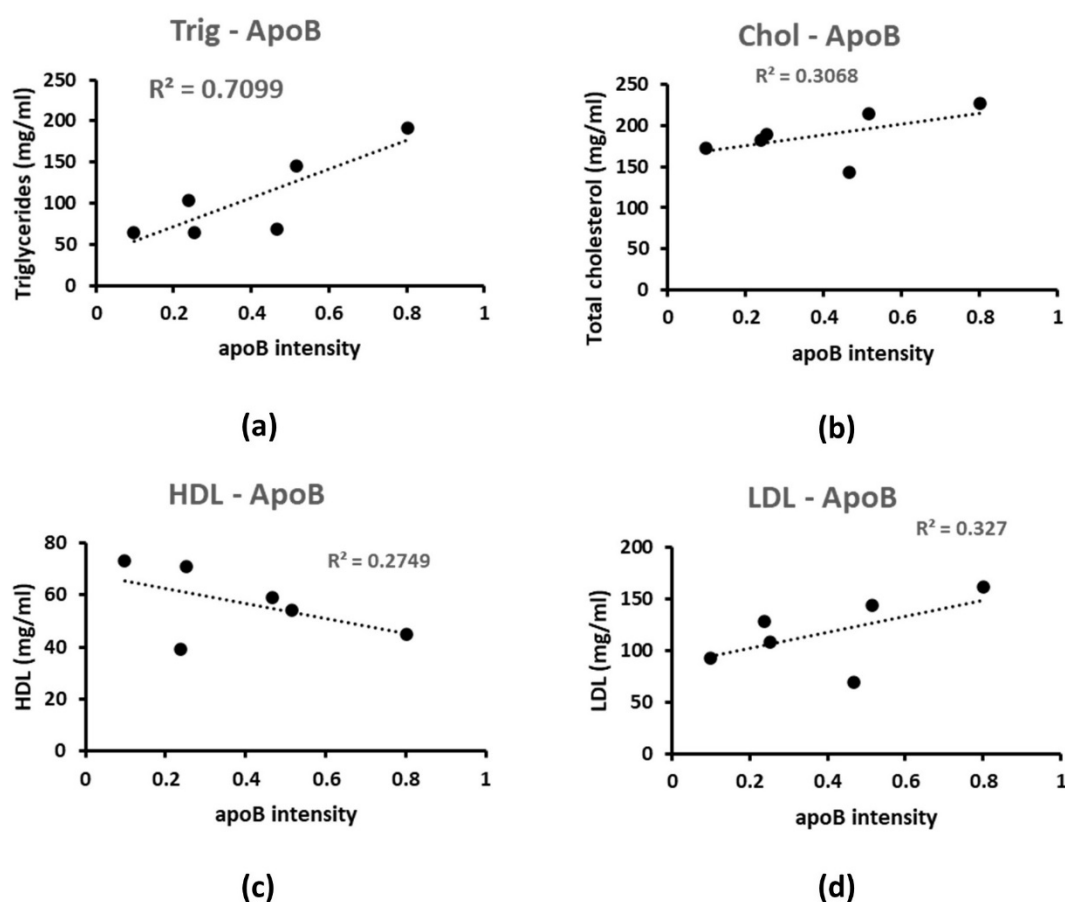

**Supplementary Figure S4.** The correlation between donor lipid profiles (Triglycerides, total cholesterol, HDL, LDL) measured in serum and ApoB intensity measured by ELISA of preparations of small extracellular vesicle (sEV) isolated by Exospin<sup>TM</sup>. Each dot corresponds to one individual. ApoB mean intensity is an average of 3 replicates. The graph (a) shows the correlation between triglycerides concentrations in serum and ApoB intensity in corresponding sEV preparations. The graph (b) shows the correlation between total cholesterol concentrations in serum and ApoB intensity in corresponding sEV preparations. The graph (c) shows the correlation between HDL concentrations in serum and ApoB intensity in corresponding sEV preparations. The graph (d) shows the correlation between LDL concentrations in serum and ApoB intensity in corresponding sEV preparations. Abbreviations: HDL - high-density lipoprotein; LDL - low-density lipoprotein; ELISA - enzyme-linked immunoassay.

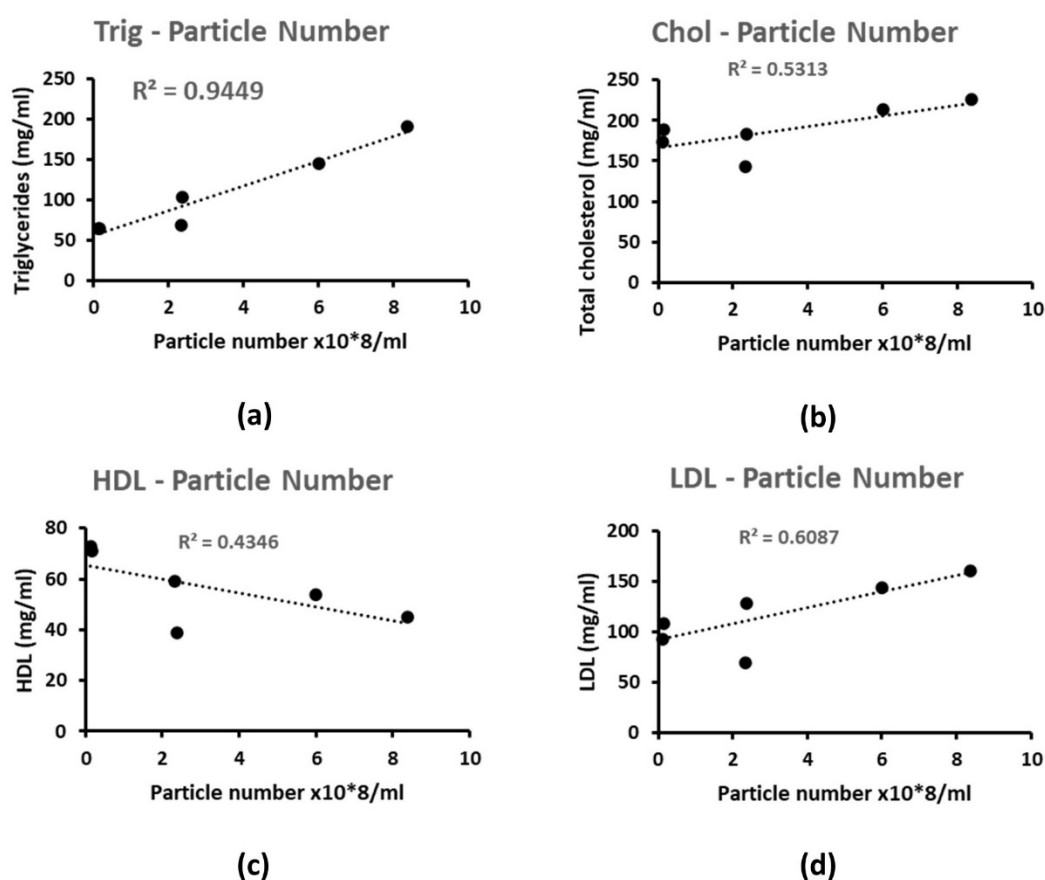

**Supplementary Figure S5.** The correlation between donor lipid profiles (Triglycerides, total cholesterol, HDL, LDL) measured in serum and the particle number of preparations of small extracellular vesicle isolated by Exo-spin™. Each dot corresponds to one donor. Particle number is an average of 3 nanoparticle tracking analysis measures. The graph (a) shows the correlation between triglycerides concentrations in serum and particle numbers in corresponding sEV preparations. The graph (b) shows the correlation between total cholesterol concentrations in serum and particle numbers in corresponding sEV preparations. The graph (c) shows the correlation between HDL concentrations in serum and particle numbers in corresponding sEV preparations. The graph (d) shows the correlation between LDL concentrations in serum and particle numbers in corresponding sEV preparations. Abbreviations: HDL—high-density lipoprotein; LDL—low-density lipoprotein.

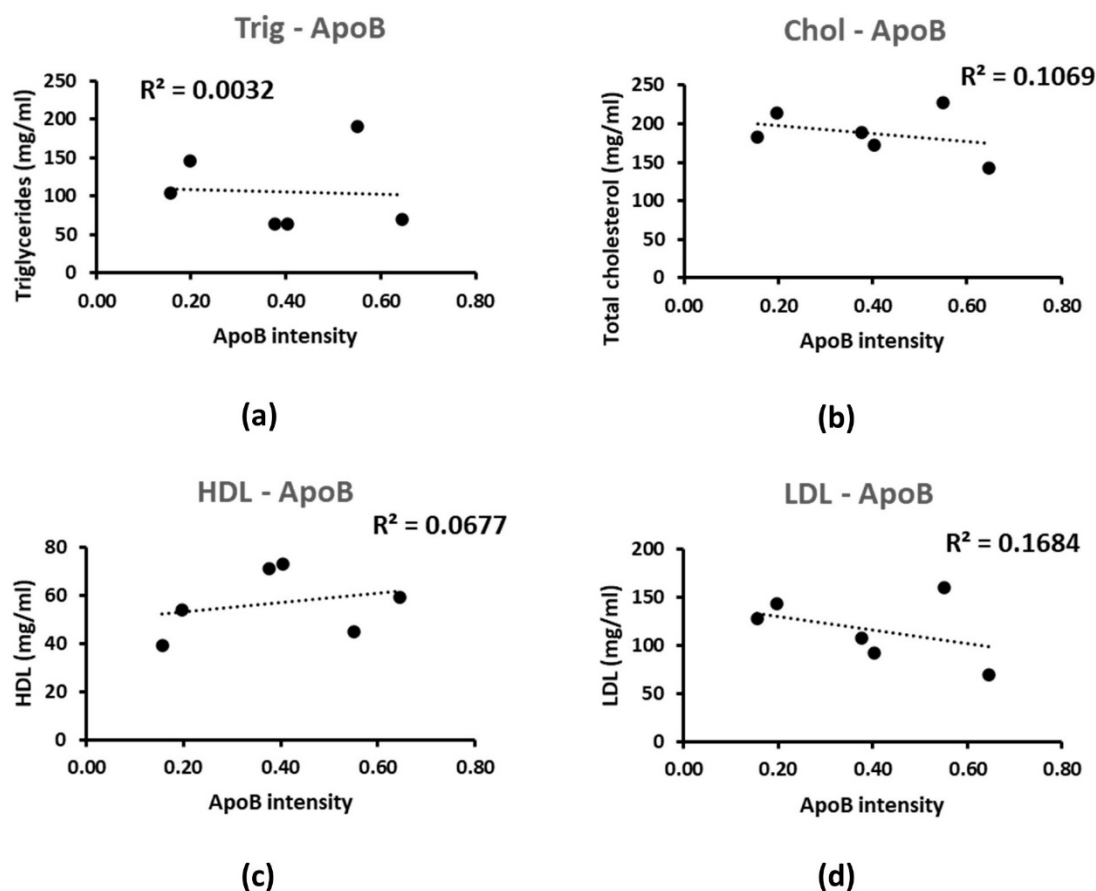

**Supplementary Figure S6.** The correlation between donor lipid profiles (Triglycerides, total cholesterol, HDL, LDL) measured in serum and ApoB intensity measured by ELISA of preparations of small extracellular vesicle isolated by differential ultracentrifugation. Each dot corresponds to one individual. ApoB mean intensity is an average of 3 replicates. The graph (a) shows the correlation between triglycerides concentrations in serum and ApoB intensity in corresponding sEV preparations. The graph (b) shows the correlation between total cholesterol concentrations in serum and ApoB intensity in corresponding sEV preparations. The graph (c) shows the correlation between HDL concentrations in serum and ApoB intensity in corresponding sEV preparations. The graph (d) shows the correlation between LDL concentrations in serum and ApoB intensity in corresponding sEV preparations. Abbreviations: HDL—high-density lipoprotein; LDL—low-density lipoprotein; ELISA—enzyme-linked immunoassay.

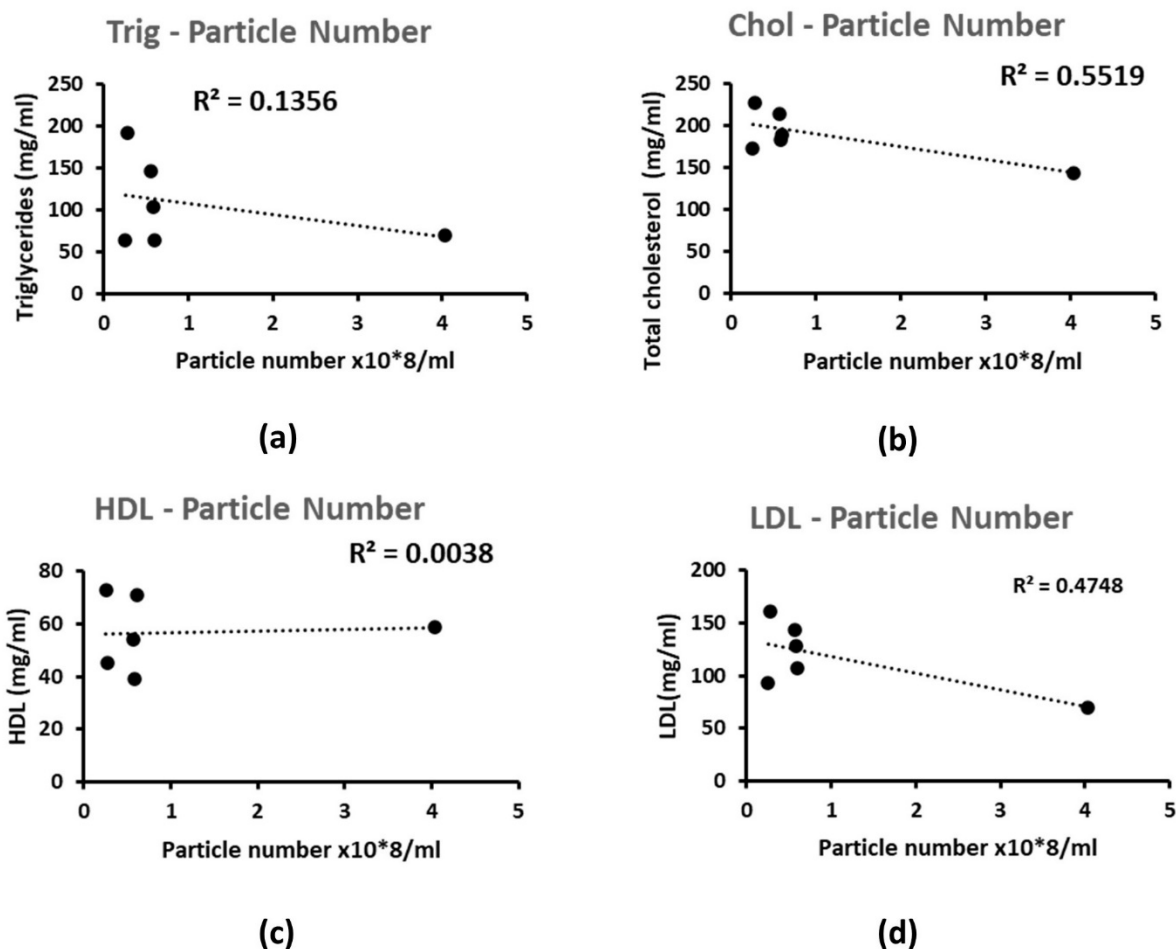

**Supplementary Figure S7.** The correlation between donor lipid profiles (Triglycerides, total cholesterol, HDL, LDL) measured in serum and the particle number of preparations of small extracellular vesicle isolated by differential ultracentrifugation. Each dot corresponds to one donor. Particle number is an average of 3 nanoparticle tracking analysis measures. The graph (a) shows the correlation between triglycerides concentrations in serum and particle numbers in corresponding sEV preparations. The graph (b) shows the correlation between total cholesterol concentrations in serum and particle numbers in corresponding sEV preparations. The graph (c) shows the correlation between HDL concentrations in serum and particle numbers in corresponding sEV preparations. The graph (d) shows the correlation between LDL concentrations in serum and particle numbers in corresponding sEV preparations. Abbreviations: HDL—high-density lipoprotein; LDL—low-density lipoprotein.



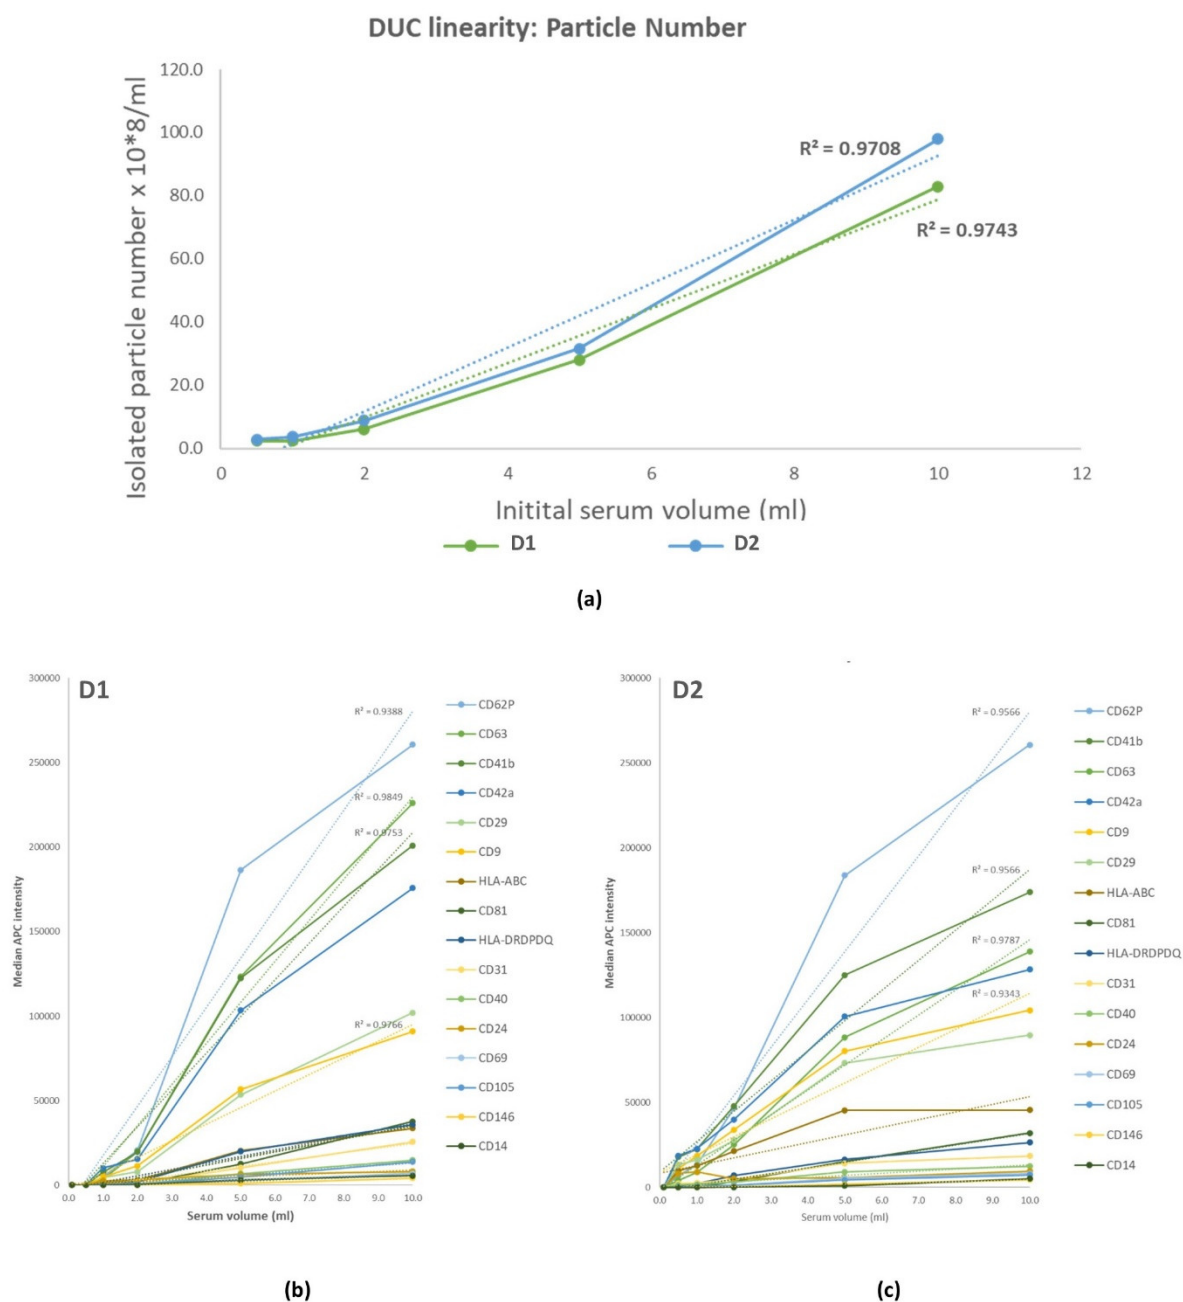

**Supplementary Figure S8.** Linearity of differential ultracentrifugation. Graph (a) shows the correlation between isolated particle number counted by NTA and the applied initial serum volume for 2 individuals (D1 and D2). Graphs (b) and (c), respectively donor 1 (D1) and donor 2 (D2) present the median APC signals acquired by MACSPlex exosome human kit that is equivalent to expression of specific surface proteins shown in different colour. Markers are correlated to the applied initial serum volume (0,5 mL; 1 mL; 2 mL; 5 mL; 10 mL). Abbreviations: NTA—nanoparticle tracking analysis. Based on this data, the linearity of differential ultracentrifugation is estimated for 1 to 5 mL of serum.

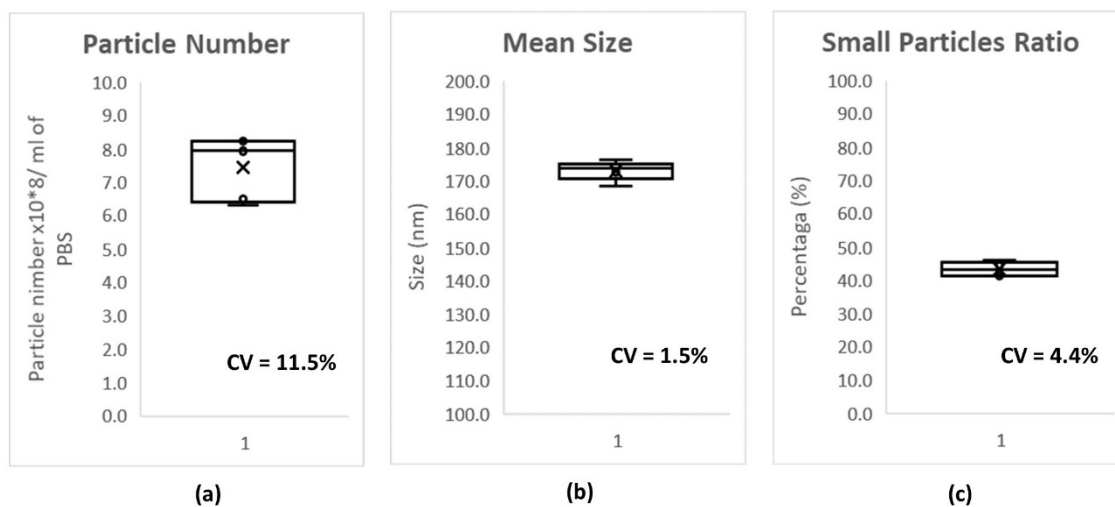

**Supplementary Figure S9.** Repeatability of differential ultracentrifugation. Small extracellular vesicles were isolated from the same serum sample in volume of 2 ml each ( $n = 5$ ). Graph (a) shows average purified particle number. Graph (b) shows particles size and its mean of diameter. Graphs (c) shows the percentage of particles that are smaller than 150 nm in diameter. Each dot corresponds to a single sample that is the mean of 3 nanoparticle tracking analysis replicates. CV = Coefficient of variation.
